1 **TITLE: Habitat complexity and benthic predator-prey interactions in Chesapeake Bay**

2

3 **AUTHORS AND ADDRESSES:** Cassandra N. Glaspie\*<sup>†</sup>, Rochelle D. Seitz

4 Virginia Institute of Marine Science, Department of Biological Sciences, Gloucester Point,

5 Virginia 23062, U.S.A.

6

7 \*Corresponding author contact information: [cglaspie1@lsu.edu](mailto:cglaspie1@lsu.edu)

8

9 <sup>†</sup>Present address: Louisiana State University, Department of Oceanography and Coastal

10 Sciences, 2179 Energy, Coast and Environment Building, Baton Rouge, LA 70803, USA

11

12

13

14

15

16

17

18

19

20

21

22

23 **ABSTRACT**

24

25           In Chesapeake Bay, the soft-shell clam *Mya arenaria* (thin-shelled, deep-burrowing)  
26 exhibits population declines when predators are active and persists at low densities. In contrast,  
27 the hard clam *Mercenaria mercenaria* (thick-shelled, shallow-burrowing) has a stable population  
28 and age distribution. We examined the potential for habitat and predators to control densities and  
29 distributions of bivalves in a field caging experiment (*Mya* only) and laboratory mesocosm  
30 experiments (both species). In the field, clams exposed to predators experienced 76.3% greater  
31 mortality as compared to caged individuals, and blue crabs were likely responsible for most of  
32 the mortality of juvenile *Mya*. In mesocosm experiments, *Mya* had lower survival in sand and  
33 seagrass than in shell hash or oyster shell habitats. However, crabs often missed one or more  
34 prey in seagrass, shell, and oyster shell habitats. Predator search times and encounter rates  
35 declined when prey were at low densities, likely due to the added cost of inefficient foraging;  
36 however, this effect was more pronounced for *Mya* than for *Mercenaria*. *Mercenaria* had higher  
37 survival than *Mya* in mesocosm experiments, likely because predators feeding on *Mercenaria*  
38 spent less time foraging than those feeding on *Mya*. *Mya* may retain a low-density refuge from  
39 predation even with the loss of structurally complex habitats, though a loss of habitat refuge may  
40 result in clam densities that are not sustainable. A better understanding of density-dependent  
41 predator-prey interactions is necessary to prevent loss of food-web integrity and to conserve  
42 marine resources.

43

44 **KEY WORDS:** bivalve, seagrass, functional response, density-dependent predation, optimal  
45 foraging

46 **INTRODUCTION**

47

48         Predators exhibit top-down control on communities, influencing the abundance, size  
49 structure, and distribution of prey by restricting their survival or activity in time and space [1–3].  
50 Predators also influence community function by preying upon dominant species [4–6]. To  
51 understand the structure and function of a community, it is important to consider the impact of  
52 the predators. Prey populations experience the effects of predation differently depending on how  
53 abundant the prey species is and, for actively foraging predators, how quickly the predator can  
54 find and consume prey [7]. The degree to which a predator can reduce prey abundance is a  
55 function of the probability of encountering a prey item, and the probability that the prey item will  
56 be eaten, given that it has been encountered. Both factors depend on the characteristics of the  
57 prey, the predator, and other environmental factors [6].

58         Bivalve mollusks exhibit a number of morphological and behavioral characteristics to  
59 defend against predators. Armor and aggregation decrease rates of predation, allowing predators  
60 and prey to coexist in the same space. For example, the infaunal, shallow-burrowing, hard-shell  
61 clam *Mercenaria mercenaria* (hereafter, *Mercenaria*) has a relatively thick shell that protects it  
62 from predation by blue crabs *Callinectes sapidus*; clams larger than 40 mm cannot be crushed  
63 and therefore coexist with crabs [8]. Other bivalves must avoid predators to survive; the shell of  
64 a soft-shell clam *Mya arenaria* (hereafter, *Mya*) is thin and has a permanent gape, indicating that  
65 for this species, shell thickness is not an important mode of protecting against attack by predators  
66 [9]. To avoid predation, large individuals of *M. arenaria* achieve a non-coexistence refuge by  
67 burrowing 25-30 cm deep in the sediment, out of range of foraging predators, which rarely  
68 consume clams buried deeper than 10 cm [10].

69           Habitat also plays an important role in predator defense strategies of marine bivalves.  
70   Predators in habitats that are not complex have a greater effect on prey than those in complex  
71   habitats [11,12]. Vegetated or shell habitat provides a refuge from predation for many prey  
72   [12,13], and increased sediment grain size allows infaunal species to avoid predators more  
73   effectively than in fine sediments [10,14,15]. Complex habitats increase metabolic costs  
74   associated with foraging, and as these costs become too high, predators may opt to conserve  
75   energy or forage elsewhere [16,17].

76           The functional response is a way to quantify predator foraging efficiency [7]. A  
77   predator's functional response is the relationship between the number of prey consumed per  
78   predator and prey density [18]. Predators that search for prey exhibit a density-dependent  
79   functional response, because the encounter rate depends on prey density. In a type II density-  
80   dependent response, handling rate and attack rate remain constant as prey density increases [7].  
81   Prey consumed per predator increases with increasing prey density, but the rate of increase  
82   declines to an upper asymptote. The asymptote is reached when the predator becomes satiated  
83   and spends less time foraging, or when the predator is limited by the amount of time it takes to  
84   consume prey [7]. A type III sigmoidal density-dependent response occurs when a predator  
85   becomes more active as prey density rises, which means attack rate is a function of prey density  
86   [7]. Type II and type III functional responses are very different biologically, since type III  
87   functional responses create a refuge for prey at low densities, which may result in prey  
88   persistence over time, even if a population is driven to low abundance [7,19,20].

89           The main parameters in a functional response model are encounter rate and handling time  
90   [7], both of which change as a function of prey mortality, prey behavior, and habitat type. For the  
91   purposes of this study, the encounter rate was defined as the number of encounters with prey

92 divided by the amount of time a predator spends foraging, or actively looking for prey; and the  
93 handling time was defined as the amount of time a predator spends manipulating or eating a prey  
94 item. For thick-shelled bivalves, the consumption rate of their predators is determined more by  
95 handling time than encounter rate; in this case, a type II functional response is more likely [14].  
96 For burrowing, thin-shelled bivalves, encounter rate is more important than handling time for  
97 their predators [2], which means that a density-dependent sigmoidal (type III) response is likely  
98 [14]. The biological mechanism behind a type III response is that low encounter rates often lead  
99 to low activity levels or predators emigrating from the area [21]. The functional response of a  
100 predator-prey interaction can also be habitat specific. Reduced sediment penetrability [14] or  
101 increased vegetative cover [22] may lead to decreased encounter rate, and this may change the  
102 functional response by creating or strengthening a low-density refuge from predation. The  
103 functional response also changes with ontogeny, as small bivalves may not have sufficiently  
104 thick shells to impact predator handling time or burrow deeply enough to reduce encounter rate  
105 with predators [23].

106 In the Chesapeake Bay, two commercially valuable clam species, the soft-shell clam *Mya*  
107 and the hard clam *Mercenaria* have very different population dynamics. Adult and sub-adults of  
108 *Mya* exist in the Bay at low abundance except immediately after spring recruitment, and  
109 juveniles are nearly completely consumed by predators each year [24] (Fig 1). *Mercenaria* is  
110 fairly abundant throughout the year, and all size classes persist in the Bay in all seasons [25] (Fig  
111 1). The different dynamics of these species may be due to predator-prey dynamics, since the two  
112 species exhibit different predator-avoidance strategies. Specifically, the persistence of *Mya* at  
113 low abundance may be due to a low-density refuge, especially in complex habitats that prevent

114 efficient foraging by the species' main predators, the blue crab *Callinectes sapidus* [26,27] and  
115 the cownose ray *Rhinoptera bonasus* [28].

116

117 **Fig 1. Size frequency histograms of *Mercenaria mercenaria* (left) and *Mya arenaria* (right)**  
118 **in lower Chesapeake Bay.** Samples were collected in spring (a-b), summer (c-d), and fall (e-f)  
119 for two years starting in fall 2011. Sizes expressed are biomass (g AFDW) for *Mercenaria* [25]  
120 and *Mya* [24].

121

122 This study aims to examine the nature of blue crab-bivalve predator-prey interactions for  
123 these two infaunal bivalves, including the role of structural refuge (in the form of complex  
124 habitat) on these interactions, using both field and laboratory experiments. In field caging  
125 experiments, we hypothesized the following: 1) blue crabs and cownose rays are both sources of  
126 mortality for sub-adult *Mya* (evidenced as a significant difference in *Mya* survival among all  
127 caging treatments); and 2) the presence of seagrass increases clam survival rates as compared to  
128 sand and mud (for all plots without a complete cage). In laboratory mesocosm experiments, we  
129 hypothesized the following: 1) predators on sub-adult *Mya* exhibit a type III functional response  
130 and predators on sub-adult *Mercenaria* exhibit a type II functional response (evidenced as a  
131 significant species-density interaction); 2) complex (as compared to unstructured) habitats  
132 increase the extent of the low-density refuge for species using density as a refuge, which  
133 manifests as increased proportional survival in complex habitats as compared to sand, but only  
134 for *Mya* (evidenced as a significant species-habitat interaction); 3) *Mercenaria*'s armor leads to  
135 increased handling time compared to *Mya* (evidenced as a significant main effect of species on  
136 handling time); 4) low densities, complex habitat, and deep-burrowing prey result in decreased

137 blue crab search time, due to the added cost of inefficient foraging (evidenced as a 3-way  
138 interaction between species, density, and habitat), and 5) there is a decreased encounter rate at  
139 low densities of *Mya* compared to high densities (evidenced as a significant species-density  
140 interaction).

141

## 142 **MATERIALS AND METHODS**

143

### 144 **Field caging experiment**

145 A caging study was conducted in patchy seagrass, sand, and mud near-shore habitats  
146 (1.5-2 m depth mean high water) in May 2014 near the mouth of the York River, VA (between  
147 37.258323, -76.428047 and 37.275197, -76.370150). These habitat types represented decreasing  
148 habitat complexity from seagrass to mud; compared to mud, sand provides additional habitat  
149 complexity for infaunal bivalves such as *Mya*, altering the functional response [29]. Ten replicate  
150 0.25 m<sup>2</sup> plots were randomly assigned one of three caging treatments in each habitat: full cage,  
151 stockade, or uncaged. Full cages were constructed of 13-mm galvanized wire mesh with PVC  
152 frames (0.6 m height, 0.5 m width, 0.5 m length) and were sunk into the sediment approximately  
153 10 cm and secured with PVC legs sunk an additional 30-40 cm. Stockades were constructed by  
154 placing 8 10-ft PVC poles around an otherwise unprotected plot at 25-cm intervals. Stockades  
155 kept cownose rays out of the plots, while still allowing for crab and fish predation. Uncaged plots  
156 were marked with two PVC poles on the diagonals.

157 Juvenile soft-shell clams (*Mya*) 20-40 mm shell length (mean 28.48 ± 4.41 mm SD) were  
158 collected from the York River and held in flow-through tanks until experimentation. Clams were  
159 marked individually with permanent marker and transplanted towards the center of the plot at

160 densities of 12 clams per plot ( $48 \text{ m}^{-2}$ ) [30]. A cage was placed over all transplanted clams to  
161 allow them to acclimate overnight and achieve a stable burrowing depth as in previous laboratory  
162 experiments under similar temperatures [21], and acclimation cages were removed from stockade  
163 and uncaged treatments. After 5 d, the contents of all plots were collected to a depth of 40 cm  
164 using a suction sampler [20]. Remaining bivalves were counted and shell fragments were noted  
165 as evidence of crab predation. Partial cages were not used to control for caging artifacts due to  
166 the short nature of this study and the tendency for partial cages to attract blue crabs. Given the  
167 relatively large aperture of the cage mesh (13 mm), we would not expect notable differences in  
168 cage artifacts among habitat types over the 5-day trial. Only one density was used in this study  
169 due to the presence of wild *Mya* in the area, and the consequent logistical difficulties associated  
170 with creating reliable densities.

171 Proportional survival data were Box-Cox transformed ( $\lambda = 0.51$ ) to achieve normality and  
172 homogeneous variance (assessed using quantile-quantile and residual plots), and analyzed using  
173 two-way ANOVA, with cage type (3 levels: full cage, stockade, and uncaged) and habitat (3  
174 levels: mud, sand, and seagrass) as fixed factors, with  $\alpha = 0.05$  for main effects and  $\alpha = 0.20$  for  
175 interaction terms [31]. Post-hoc pairwise comparisons were done using Tukey honest significant  
176 difference (HSD) tests. From a pilot caging experiment in 2012, we used a simulation of  
177 resampled data to determine that our sample size of  $n = 10$  resulted in the following estimates of  
178 statistical power: 1.00 for the main effect of cage type, 0.42 for the main effect of habitat, and  
179 0.87 for the interaction effect.

180



181 **Laboratory mesocosm experiment**

182 *Mya* (thin-shelled, deep infaunal) and *Mercenaria* (thick-shelled, shallow infaunal) were  
183 exposed to blue crab *C. sapidus* predation in mesocosm tanks of 0.87 m diameter and 0.59 m  
184 height, which were partitioned with corrugated plastic to form a rectangular experimental arena  
185 (40 cm x 70 cm). Sand was added to the tank to 25 cm depth, and an additional 25 cm of the tank  
186 was filled with filtered water from the York River. An aquarium heater held tank temperature  
187 constant at 26-27 °C, typical of shallow York River water in the summer months [32], and the  
188 water was aerated by air stones placed outside the experimental arena. Trials were randomly  
189 assigned one of four habitat treatments: sand alone, sand/shell hash, sand/oyster shell, or  
190 sand/seagrass. For trials receiving shell or oyster shell, a constant volume of 0.5-L crushed shell  
191 hash (lightly crushed Baltic clam *Macoma balthica*, ribbed mussel *Geukensia demissa*, and  
192 *Mercenaria* shell halves) or oyster shell halves was added to the center of the mesocosm tank.  
193 Eelgrass (*Zostera marina*) and widgeongrass (*Ruppia maritima*) shoots and rhizomes were  
194 collected from the York River and used to construct seagrass mats for use in trials receiving  
195 seagrass. Seagrass mats were constructed with 0.5 liter of natural seagrass blades tied onto  
196 plastic 1-cm Vexar mesh meant to simulate a rhizome mat. Holes measuring approximately 25  
197 cm<sup>2</sup> were cut approximately every 10 cm to allow crabs to forage for clams buried under the  
198 simulated seagrass mat. The mesh and attached seagrass roots were placed in the center of the  
199 tank and completely covered with sand.

200 Juvenile *Mya* 20-40 mm shell length were collected from the York River and held in  
201 flow-through tanks until experimentation. Hard clams *Mercenaria* 30-40 mm shell length were  
202 obtained from Cherrystone Aqua-Farms in Virginia. Only hard clams with shell lengths < 40 mm  
203 were used in the study, because blue crabs are able to consume clams of this size [33]. Bivalves

204 were placed in the sediment siphon up, away from the edge of the tank to avoid edge effects, and  
205 allowed 24 h to achieve a stable burial depth [21]. Each species was transplanted at two densities  
206 as determined from the literature, one low and one medium density. When number of prey  
207 consumed is converted to proportion of prey eaten per predator, two densities (low and medium)  
208 are sufficient to determine whether a low-density refuge exists (positive relationship between  
209 proportional mortality and prey density, indicating at type III functional response) or does not  
210 exist (negative relationship between proportional mortality and prey density, indicating at type II  
211 functional response, as in previous studies [21,34]). Low densities for both species were 4 clams  
212 per tank, and medium densities were 11 clams per tank for *Mercenaria* and 16 clams per tank for  
213 *Mya* [16,34].

214 *Callinectes sapidus* were collected from the York River via baited crab pot. All crabs  
215 were acclimated to the lab for 1 week or longer and fed fish or clam meat three times per week.  
216 At the start of the experiment, one adult male blue crab with a carapace width  $\geq 100$  mm was  
217 added to each tank receiving a predator treatment. Bivalves were exposed to blue crab predation  
218 for 48 h, as is common for similar mesocosm studies [20]. Remaining bivalves were excavated  
219 and counted upon termination of the experiment. There were six replicates of each  
220 habitat/density combination, as well as an equal number of mesocosms set up without predators,  
221 which served as controls (though only 0.6% of clams died in predator-free controls and they are  
222 not analyzed or discussed further).

223 Proportional survival data were Box-Cox transformed ( $\lambda = -0.14$ ) to achieve normality  
224 and homogeneous variance (assessed using quantile-quantile and residual plots), and they were  
225 analyzed using three-way ANOVA, with density (2 levels: low and medium), species (2 levels:  
226 *Mya* and *Mercenaria*) and habitat (4 levels: sand, shell hash, oyster shell, and seagrass) as fixed

227 factors, with  $\alpha = 0.05$  for main effects and  $\alpha = 0.20$  for interaction terms [31]. Effect size and  
228 standard error estimates from a previously conducted mesocosm experiment [21] were used to  
229 calculate power to see a significant main effect of density, which was 0.95 for  $n = 6$ . Post-hoc  
230 pairwise comparisons were done using Tukey HSD tests.

231         It was not possible to use a different crab for each trial due to space requirements, nor  
232 was it possible to use each crab the same number of times due to losses throughout the  
233 experiment. Crabs were used between one and five times, and crabs were randomly assigned to  
234 trials so there was no bias inherent in the re-use of crabs. An ANCOVA including density,  
235 species, habitat, individual crab identity (51 levels), number of times a crab was used  
236 (continuous, 1-5), tank (4 levels), and day of the experiment (continuous, standardized using z  
237 score transformation) as covariates indicated that there was no difference in proportion of  
238 bivalves eaten based on crab identity ( $F_{49, 24} = 1.23$ ,  $p = 0.30$ ), number of times the crabs were  
239 used ( $F_{1, 24} = 1.56$ ,  $p = 0.22$ ), tank ( $F_{3, 24} = 0.48$ ,  $p = 0.70$ ), or day of the experiment ( $F_{1, 24} = 1.15$ ,  
240  $p = 0.29$ ). These results provided no evidence that crabs exhibited learning behavior, and no  
241 evidence for tank effects or trends through time; thus, each trial was treated as an independent  
242 replicate.

243         For half of the trials ( $n = 3$  for each treatment) predator behavior was recorded using an  
244 infrared-sensitive camera system. A red spotlight was used to improve night-time video quality  
245 without disrupting crab behavior [35]. Videos were used to calculate search time, encounter rate,  
246 and handling time. Search time (h) was defined as the total time spent exhibiting foraging  
247 behavior, such as probing the sediment with legs or claws or lifting items to mouthparts.  
248 Encounter rate ( $\text{hr}^{-1}$ ) was defined as the number of encounters (picking up bivalve) divided by  
249 the search time. Handling time (h) was defined as the total time spent manipulating or eating a

250 bivalve, divided by the number of encounters. Handling time, search time, and encounter rate  
251 were fourth-root transformed to achieve homogeneity and compared for the two bivalve species  
252 in different habitat treatments and at different densities using three-way ANOVAs with the same  
253 factors as were used for analysis of proportional survival. Post-hoc pairwise comparisons were  
254 done using Tukey HSD tests.

255 All analyses were completed using R statistical software [36], and data and R code files  
256 are available in the Knowledge Network for Biocomplexity (KNB) repository [37].

257

## 258 **ETHICS STATEMENT**

259

260 Virginia Institute of Marine Science is statutorily mandated as Virginia's scientific advisor on  
261 marine- and coastal-related natural resources and exempt from having to obtain a scientific  
262 collection permit for non-protected species in Virginia's waters.

263

## 264 **RESULTS**

265

### 266 **Field caging experiment**

267 Over the 5-day caging experiment, mean water temperature at the nearby YKTV2  
268 weather buoy was 18.76 °C ( $\pm$  1.63 SD). All replicates (n = 10) for the stockade and uncaged  
269 plots lasted through the experiment and were subsequently sampled. At least one of the caged  
270 plots was lost from each habitat, leaving n = 9 replicates in mud, n = 7 replicates in sand, and n =  
271 8 replicates in seagrass.

272 As compared to full cages, there was a decrease in proportional survival of 75.6% in  
 273 stockades and 77.0% in uncaged plots (Fig 2), but the effect of one main effect depended on the  
 274 conditions of the other (Table 1). Stockade and uncaged treatments had similar survival among  
 275 habitats ( $p = 1.0$ ). Mud had significantly lower survival than sand ( $p = 0.002$ ) or seagrass ( $p =$   
 276  $0.0002$ ). Seagrass and sand had similar survival ( $p = 0.86$ ). Due to a significant habitat x cage  
 277 interaction, main effects need to be interpreted with caution (Table 1). The significant habitat x  
 278 cage treatment interaction was driven by the full cage treatment, which had different patterns of  
 279 survival than the other caging treatments (Supp. Table 1). Survival of clams in stockades placed  
 280 in mud was lower than might be expected with just main effects of habitat and cage type (Supp.  
 281 Table 1).

282

283 Table 1. ANOVA summary table for field caging study proportional survival data.

284 Three types of caging treatments (full cage, stockade, and uncaged) were placed in three habitat  
 285 types (mud, sand, and seagrass); all were included in the ANOVA model as fixed factors. Data  
 286 were Box-Cox transformed ( $\lambda = 0.51$ ) prior to analysis. Significant p values (at  $\alpha = 0.05$  for main  
 287 effects and  $\alpha = 0.20$  for interaction terms) are bolded.

288

|                       | <i>Df</i> | <i>Sum Sq</i> | <i>Mean Sq</i> | <i>F value</i> | <i>Pr(&gt;F)</i>   |
|-----------------------|-----------|---------------|----------------|----------------|--------------------|
| <i>Habitat</i>        | 2         | 2.65          | 1.32           | 10.35          | <b>0.0001</b>      |
| <i>Cage</i>           | 2         | 20.29         | 10.14          | 79.28          | <b>&lt; 0.0001</b> |
| <i>Habitat x Cage</i> | 4         | 2.59          | 0.65           | 5.05           | <b>0.001</b>       |
| <i>Residuals</i>      | 75        | 9.60          | 0.13           |                |                    |

289

290 **Fig 2. Survival of transplanted juvenile *Mya arenaria* exposed to a natural suite of**  
291 **predators near the mouth of the York River, VA.** Shown are mean proportional survival ( $\pm 1$   
292 SE) after 5 d in the field. Bivalves were placed in full cages (full), stockades, or uncaged plots.  
293 Plots were in different habitats (denoted by different color bars). There were  $n = 10$  replicates for  
294 the stockade and uncaged plots, and  $n = 9, 7,$  and  $8$  replicates for cages in mud, sand, and  
295 seagrass, respectively.

296

297 On average, 39.3% of missing clams were recovered as crushed shells within the plots.  
298 Mean recovery of crushed shells varied little among caging types and habitats. The highest  
299 occurred in stockade plots in sand, with 49.2% ( $\pm 28.7$  SD) of missing clams recovered as  
300 crushed shells, and lowest occurred in uncaged plots in mud, with 24.7% ( $\pm 26.5$  SD) of missing  
301 clams recovered as crushed shells. Not all clams were recovered from caged plots because the  
302 suction sampler used to retrieve clams missed some individuals.

303

#### 304 **Laboratory mesocosm experiment**

305 In mesocosm experiments, mean proportional survival ranged from 0.27 (*Mya* in seagrass  
306 at medium densities) to 1.00 (*Mercenaria* in seagrass at medium densities). Crabs ate at least one  
307 *Mercenaria* in 18 out of 48 trials, and ate all offered *Mercenaria* in only one trial (low density in  
308 shell). Predation of *Mya* was more common, with at least one *Mya* eaten in 27 out of 48 trials. In  
309 the sand at low densities, crabs either ate all of the available *Mya* (occurred 3 times), or none of  
310 them (occurred 3 times). In the more-complex habitats (shell hash, oyster shell, and seagrass),  
311 crabs offered low densities of clams usually ate none of them (occurred 13 out of 18 trials); only

312 occasionally would a crab eat a portion of the total number of clams offered (1, 2, or 3 clams;  
313 occurred 3 times) or all 4 of the clams (occurred 2 times).

314 *Mya* had significantly lower survival than *Mercenaria* (Fig 3; Table 2), but the effect of  
315 one main effect depended on the conditions of the others. There was some evidence that bivalves  
316 had lower proportional survival in trials with medium bivalve densities than in trials with low  
317 bivalve densities (Table 2). There were no significant differences in survival by habitat type or  
318 bivalve density (Table 2), but there were significant species x habitat interactions. *Mya* in  
319 medium densities had lower survival than the other species x density combinations, driving a  
320 significant species x density interaction (Supp. Table 2). In sand and seagrass, *Mya* had lower  
321 survival than some other species x habitat combinations, driving a significant species x habitat  
322 interaction (Supp. Table 3).

323 Table 2. ANOVA results for mesocosm study proportional survival of juvenile clams, as well as handling time (HT), search time (ST),  
 324 and encounter rate (ER) of blue crabs *Callinectes sapidus* feeding on juvenile clams. Two species (*Mya arenaria* and *Mercenaria*  
 325 *mercenaria*) were offered to blue crabs *Callinectes sapidus* at two densities (low and medium) in tanks with four different habitats  
 326 (sand, sand with shell hash, sand with oyster shell halves, and sand with live seagrass); all were included in the ANOVA model as  
 327 fixed factors. Data were Box-Cox transformed ( $\lambda = -0.14$ ; survival only) or fourth-root transformed (HT, ST, and ER) prior to  
 328 analysis. Significant p values (at  $\alpha = 0.05$  for main effects and  $\alpha = 0.20$  for interaction terms) are bolded.  
 329

|                                    | <i>Survival</i>                             | <i>HT</i>                                | <i>ST</i>                                  | <i>ER</i>                                |
|------------------------------------|---------------------------------------------|------------------------------------------|--------------------------------------------|------------------------------------------|
| <i>Species</i>                     | <b>F<sub>1,80</sub> = 15.90, p = 0.0001</b> | F <sub>1,32</sub> = 2.87, p = 0.10       | F <sub>1,32</sub> = 0.69, p = 0.41         | F <sub>1,32</sub> = 0.07, p = 0.79       |
| <i>Density</i>                     | F <sub>1,80</sub> = 3.68, p = 0.06          | <b>F<sub>1,32</sub> = 4.28, p = 0.05</b> | <b>F<sub>1,32</sub> = 10.10, p = 0.003</b> | <b>F<sub>1,32</sub> = 6.46, p = 0.02</b> |
| <i>Habitat</i>                     | F <sub>3,80</sub> = 1.86, p = 0.14          | F <sub>3,32</sub> = 1.23, p = 0.32       | F <sub>3,32</sub> = 0.31, p = 0.82         | F <sub>3,32</sub> = 1.19, p = 0.33       |
| <i>Species x Density</i>           | <b>F<sub>1,80</sub> = 7.17, p = 0.01</b>    | F <sub>1,32</sub> = 0.03, p = 0.88       | <b>F<sub>1,32</sub> = 11.38, p = 0.002</b> | F <sub>1,32</sub> = 0.95, p = 0.34       |
| <i>Species x Habitat</i>           | <b>F<sub>3,80</sub> = 2.19, p = 0.10</b>    | <b>F<sub>3,32</sub> = 2.01, p = 0.13</b> | F <sub>3,32</sub> = 1.13, p = 0.35         | F <sub>3,32</sub> = 0.65, p = 0.59       |
| <i>Density x Habitat</i>           | F <sub>3,80</sub> = 0.65, p = 0.58          | F <sub>3,32</sub> = 0.91, p = 0.45       | F <sub>3,32</sub> = 1.47, p = 0.24         | F <sub>3,32</sub> = 1.27, p = 0.30       |
| <i>Species x Density x Habitat</i> | F <sub>3,80</sub> = 0.62, p = 0.61          | F <sub>3,32</sub> = 0.25, p = 0.86       | <b>F<sub>3,32</sub> = 2.08, p = 0.12</b>   | F <sub>3,32</sub> = 0.54, p = 0.66       |



330 **Fig 3. Density-dependent predation in different habitats.** Mean juvenile *Mya arenaria* and  
331 *Mercenaria mercenaria* proportional survival ( $\pm 1$  SE) in mesocosms when exposed to blue crab  
332 predation in a) sand, b) shell hash, c) oyster shell, and d) seagrass. Solid black lines are mean  
333 proportional survival for *Mya* at two initial densities of 4 and 16 per tank, and dashed black lines  
334 are mean proportional survival for *Mercenaria* at two initial densities of 4 and 11 per tank.

335

336 Handling time was significantly lower in low-density trials than in medium-density trials  
337 (Fig 4a, b; Table 2), but the effect of one main effect depended on the conditions of the others.  
338 The two treatments with the longest mean handling times were *Mercenaria* at medium density in  
339 shell hash (1.31 h) and *Mercenaria* at medium density in sand (0.76 h). All other treatments had  
340 mean handling times of 0.30 h or less. The overall mean handling times for *Mercenaria* and *Mya*  
341 were 0.18 h and 0.03 h, respectively. In shell hash, *Mercenaria* had longer handling times than  
342 the rest of the species x habitat combinations, driving a significant species x habitat interaction  
343 (Supp. Table 4).

344

345 **Fig 4. Behavior of blue crab *Callinectes sapidus* feeding on juvenile *Mya arenaria* and**  
346 ***Mercenaria mercenaria*.** Shown are means ( $\pm 1$  SE) of a) handling time (HT) for crabs feeding  
347 on *Mya*, b) HT for crabs feeding on *Mercenaria*, c) search time (ST) for crabs feeding on *Mya*,  
348 d) ST for crabs feeding on *Mercenaria*, e) encounter rate (ER) for crabs feeding on *Mya*, and f)  
349 ER for crabs feeding on *Mercenaria*. Lines of different colors and patterns represent different  
350 habitat types (shell = shell hash; oyster = oyster shell), and means were calculated from  $n = 3$   
351 trials.

352

353 Search time was shorter in low-density trials than in medium-density trials (Fig 4c, d;  
354 Table 2), but the effect of one main effect depended on the conditions of the others. The two  
355 treatments with the longest mean search times were *Mya* at medium density in seagrass (5.67 h)  
356 and *Mya* at medium density in oyster shell (5.56 h). The overall mean search times for  
357 *Mercenaria* at low and medium densities were 1.22 h and 1.91 h, respectively. The overall mean  
358 search times for *Mya* at low and medium densities were 0.89 h and 4.16 h, respectively. *Mya* at  
359 medium densities had longer search times than the other species x density combinations, driving  
360 a significant species x density interaction (Supp. Table 5). However, relatively long search times  
361 for medium densities of *Mya* only occurred in certain habitats (sand, oyster shell, and seagrass),  
362 resulting in a three-way interaction (Supp. Table 6).

363 Encounter rate was significantly lower in low-density trials than in medium-density trials  
364 (Fig 4e, f; Table 2). The two treatments with the highest mean encounter rates were *Mya* at  
365 medium density in sand (4.08 ind. h<sup>-1</sup>) and *Mya* at medium density in seagrass (3.23 ind. h<sup>-1</sup>).  
366 The overall mean encounter rates for *Mercenaria* at low and medium densities were 0.79 ind. h<sup>-1</sup>  
367 and 1.80 ind. h<sup>-1</sup>, respectively. The overall mean encounter rates for *Mya* at low and medium  
368 densities were 0.81 ind. h<sup>-1</sup> and 2.85 ind. h<sup>-1</sup>, respectively.

369

## 370 **DISCUSSION**

371

372 Blue crabs were the main predators of *Mya* in all habitats we examined, with no  
373 significant difference between stockades and uncaged plots and high incidence of crushed shells,  
374 which is evidence of crab predation rather than another source of mortality [3]. This was in line  
375 with our hypothesis that crab predation would be important. Despite evidence in the literature

376 that schooling rays can result in mass mortality of bivalves [38], and evidence from gut content  
377 analysis that cownose rays consume *Mya* [28], we did not observe evidence that cownose rays  
378 increased predation in uncaged plots relative to stockade plots during the time frame of our field  
379 experiment (May). These results were contrary to our hypothesis and indicate that over the time  
380 and spatial scale of this study, rays were not a major source of mortality for *Mya*.

381 Predation-related mortality was high for juvenile *Mya* that were not protected by a cage.  
382 Over a period of five days, exposure to predators decreased survival of juvenile *Mya* by 76.3% as  
383 compared to caged individuals. Clam survival was habitat dependent, and both sand and seagrass  
384 provided more refuge from predation than mud. *Mya arenaria* has previously been shown to  
385 achieve a low-density refuge in sand [14,21]; however, the results from the field caging  
386 experiment went against our hypothesis that the added complexity afforded by seagrass habitats  
387 provides an extended refuge for juvenile *Mya*. In the laboratory study, there was an effect of  
388 habitat on predator-related mortality only for *Mya*, which had lower survival in sand and  
389 seagrass than in shell hash or oyster shell habitats. However, in the case of a prey species that  
390 relies on achieving a low-density refuge for persistence, proportional survival may not be the  
391 best measure of success. Shell hash, oyster shell, and seagrass habitats had higher occurrence of  
392 trials with at least one clam remaining, which may be biologically meaningful. Habitat that  
393 allows survival of one or a few clams may maintain the low-density refuge for *Mya*.

394 Seagrass did not provide a refuge from predation for *Mya* in the field or in the laboratory  
395 experiment. However, seagrass in both studies was patchy; mesocosms were small, and caging  
396 sites were chosen so that the three habitat types (mud, sand, and seagrass) were in close  
397 proximity. Fragmented seagrass may not be able to provide much protection from generalist  
398 predators such as blue crabs, especially if they feed efficiently at patch edges [39]. Despite little

399 evidence for patchy seagrass as a refuge from predation from this study, *Mya* are more likely to  
400 be found in seagrass than all other habitat types in the lower Chesapeake Bay [24]. This indicates  
401 that dense, contiguous seagrass stands may still provide a refuge from predation for *Mya*. Future  
402 research examining the effect of seagrass density or patch size on the survival of juvenile *Mya* is  
403 warranted.

404         Predators on *Mercenaria* (thick-shelled infaunal) and *Mya* (thin-shelled infaunal) had  
405 significantly different functional responses. Predators on *Mya* had a type III sigmoidal functional  
406 response, with a negative relationship between density and proportional survival, as has been  
407 seen in previous studies [14]. Predators on *Mercenaria* had a type II hyperbolic functional  
408 response, as has been seen previously [16], exhibiting either a positive relationship between  
409 density and proportional mortality or no density dependence, depending on the habitat. This  
410 difference is relevant to population dynamics and persistence of these two bivalve species  
411 because a type II functional response is unstable and can lead to local extinction of prey if they  
412 are driven to low densities, but a type III functional response may lead to prey persistence at low  
413 density [7,40]. The type II functional response of predators feeding on *Mercenaria* means this  
414 bivalve species must remain at relatively high densities to achieve population stability.  
415 Conversely, the type III functional response of predators feeding on *Mya* allows the species to  
416 persist, even at very low density.

417         The differences in functional response of predators feeding on *Mya* and *Mercenaria* were  
418 likely due to differences in predator behavior. Predators had shorter search time and encounter  
419 rate when prey were in low densities as compared to high densities, in agreement with our  
420 hypotheses, as predators appeared to give up foraging. At low densities, encounter rate did not  
421 differ between the two bivalve species, indicating blue crabs had less trouble finding deep-

422 burrowing clams than we hypothesized. There was no evidence that blue crabs spent less time  
423 foraging in complex habitats or when exposed to deep-burrowing prey; on the contrary, blue  
424 crabs spent more time searching for *Mya* at medium densities than they did searching for  
425 *Mercenaria* at medium densities, indicating crabs may have a preference for *Mya* as prey. This  
426 tendency of blue crabs to pass up *Mercenaria* as prey may explain why handling times for  
427 *Mercenaria* were not significantly greater than handling times for *Mya*; while some crabs spent  
428 the extra time opening up the thick-shelled clams (*Mercenaria*), many predators also gave up  
429 without investing much time into the encounter.

430 Declines in complex habitat will likely lead to declines in thin-shelled species such as  
431 *Mya*. Oyster shell and shell hash provided juvenile *Mya* some protection from predation in  
432 mesocosm trials; however, in Chesapeake Bay, hard-bottom substrate, such as shell, is relatively  
433 uncommon [41]. Loss of many bivalves in the Bay, including oysters [42,43] and large-bodied  
434 clams [24,44,45], will make hard-bottom shell-hash habitat even more rare in the future.  
435 Seagrass has also experienced declines in the Chesapeake Bay [46], resulting in a decrease of  
436 many potential sources of highly complex benthic habitat in the Bay and a subsequent decrease  
437 in refuge for thin-shelled clams. *Mya* may retain a low-density refuge from predation even with  
438 the loss of structurally complex habitats, though a loss of habitat-mediated refuge may eventually  
439 result in clam densities that are not sustainable.

440 Loss of complex habitat in the Chesapeake Bay may have little impact on thick-shelled,  
441 infaunal bivalves such as *Mercenaria*, *Rangia cuneata*, and ark clams (*Noetia ponderosa* and  
442 *Anadara* spp.). We did not see an effect of habitat on *Mercenaria* survival in the current study,  
443 yet in previous research, *Mercenaria* had higher survival in crushed oyster shell habitats than in  
444 sand or mud [33]. This inconsistency is likely due to the use of larger clams in the current study

445 (~30 mm shell length) as compared to the previous study, which used clams 5-10 mm shell  
446 length [33]. Ontogenetic shifts in functional response may drive spatial distributions of hard-  
447 shelled bivalves in Chesapeake Bay, which are most dense in oyster shell habitats [47].  
448 However, the effect of habitat on survival of recruits does not appear to impact population  
449 dynamics of large *Mercenaria*, which were present in multiple size classes throughout the year in  
450 lower Chesapeake Bay. Future research should examine whether complex habitat reduces blue  
451 crab encounter rates with small (< 10 mm) *Mercenaria* to determine the relationship between this  
452 species and complex habitat over its entire ontogeny.

453

#### 454 **Relevance for conservation**

455

456         Understanding the mechanism underlying bivalve refuges from predation is important in  
457 a changing world. Loss of structured habitat such as seagrass, mangroves, coral reefs, and oysters  
458 is occurring world-wide [48]. There is a current research need for models that can be used to  
459 forecast the impacts of global change, such as habitat loss, on predator-prey interactions [49].  
460 We demonstrated that understanding the effect of habitat loss on predator-prey interactions is  
461 improved by understanding the mechanisms prey use to defend themselves against predators and  
462 the effects of prey density.

463         Nonlinear predator-prey dynamics can result in catastrophic changes and regime shifts  
464 [50,51]. An examination of the functional response is key in predicting the result of predator-  
465 prey interactions over time, and determining if a population crash can be expected in a food web,  
466 potentially leading to a regime shift. For instance, functional responses will be a major factor in  
467 determining whether a species driven to low abundance is likely to become locally extinct, or if

468 it is likely to persist [19]. Documenting the functional response of bivalve species with a variety  
469 of different physical characteristics can help ecosystem managers decide on which species to  
470 focus conservation efforts, since species with a type II functional response are at higher risk of  
471 local extinction [52,53], and populations exhibiting a type III functional response are generally  
472 more stable over time [21,54,55].

473         A better understanding of density-dependent predator-prey interactions can be used to  
474 inform a variety of ecosystem management decisions. For example, functional responses can be  
475 used to determine a threshold density for reintroduction of endangered or depleted species [56],  
476 stock enhancement, [12,13], and pest control [57,58]. Effective bivalve seeding efforts that take  
477 into account predation may help restore marine bivalves, many of which have experienced severe  
478 declines in the recent past [42,43,59,60]. A better understanding of density-dependent predator-  
479 prey interactions will assist in the effort to maintain the integrity of marine trophic interactions  
480 and the viability of marine resources.

481

## 482 **ACKNOWLEDGMENTS**

483

484         We gratefully acknowledge the assistance given by the students and staff of the  
485 Community Ecology and Marine Conservation Biology labs at the Virginia Institute of Marine  
486 Science. This paper is contribution number XXXX from the Virginia Institute of Marine Science,  
487 College of William & Mary.

488

489

490

491 **REFERENCES**

492

- 493 1. Garrity SD, Levings SC. A predator-prey interaction between two physically and  
494 biologically constrained tropical rocky shore gastropods: Direct, indirect and community  
495 effects. *Ecol Monogr.* 1981;51: 267–286. doi:10.2307/2937274
- 496 2. Micheli F. Effects of predator foraging behavior on patterns of prey mortality in marine  
497 soft bottoms. *Ecol Monogr.* 1997;67: 203–224.
- 498 3. Beal BF. Relative importance of predation and intraspecific competition in regulating  
499 growth and survival of juveniles of the soft-shell clam, *Mya arenaria* L., at several spatial  
500 scales. *J Exp Mar Bio Ecol.* 2006;336: 1–17. doi:10.1016/j.jembe.2006.04.006
- 501 4. Randall JE. Overgrazing of algae by marine fishes. *Ecology.* 1961;42: 812.
- 502 5. Dayton PK. Competition, disturbance, and community organization: The provision and  
503 subsequent utilization of space in a rocky intertidal community. *Ecol Monogr.* 1971;41:  
504 351–389. doi:10.2307/1948498
- 505 6. Lubchenco J, Gaines SD. A unified approach to marine plant-herbivore interactions. I.  
506 Populations and communities. *Annu Rev Ecol Syst.* 1981;12: 405–437.
- 507 7. Hassell MP. *The Dynamics of Arthropod Predator-Prey Systems.* Princeton, New Jersey:  
508 Princeton University Press; 1978.
- 509 8. Blundon JA, Kennedy VS. Mechanical and behavioral aspects of blue crab, *Callinectes*  
510 *sapidus* (Rathbun), predation on Chesapeake Bay bivalves. *J Exp Mar Bio Ecol.* 1982;65:  
511 47–65.
- 512 9. Vermeij GJ. *Evolution and Escalation: An Ecological History of Life.* Princeton, New  
513 Jersey: Princeton University Press; 1987.
- 514 10. Blundon JA, Kennedy VS. Refuges for infaunal bivalves from blue crab, *Callinectes*



- 515 *sapidus* (Rathbun), predation in Chesapeake Bay. *J Exp Mar Bio Ecol.* 1982;65: 67–81.
- 516 11. Sih A, Crowley P, Mcpeek M, Petranka J, Strohmeier K. Predation, competition, and prey  
517 communities: A review of field experiments. *Annu Rev Ecol Syst.* 1985;16: 269–311.
- 518 12. Stoner AW. Habitat-mediated survival of newly settled red king crab in the presence of a  
519 predatory fish: Role of habitat complexity and heterogeneity. *J Exp Mar Bio Ecol.*  
520 Elsevier B.V.; 2009;382: 54–60. doi:10.1016/j.jembe.2009.10.003
- 521 13. Long WC, Whitefleet-Smith L. Cannibalism in red king crab: Habitat, ontogeny, and the  
522 predator functional response. *J Exp Mar Bio Ecol.* 2013;449: 142–148.  
523 doi:10.1016/j.jembe.2013.09.004
- 524 14. Seitz RD, Lipcius RN, Hines AH, Eggleston DB. Density-dependent predation, habitat  
525 variation, and the persistence of marine bivalve prey. *Ecology.* 2001;82: 2435–2451.
- 526 15. Quammen ML. Predation by shorebirds, fish, and crabs on invertebrates in intertidal  
527 mudflats: An experimental test. *Ecology.* 1984;65: 529–537.
- 528 16. Sponaugle S, Lawton P. Portunid crab predation on juvenile hard clams: Effects of  
529 substrate type and prey density. *Mar Ecol Prog Ser.* 1990;67: 43–53.  
530 doi:10.3354/meps067043
- 531 17. Abrams PA. Functional responses of optimal foragers. *Am Nat.* 1982;120: 382–390.
- 532 18. Solomon ME. The natural control of animal populations. *J Anim Ecol.* 1949;18: 1–35.  
533 doi:10.2307/1578
- 534 19. Hassell MP, May RM. Stability in insect host-parasite models. *J Anim Ecol.* 1973;42:  
535 693–726. doi:10.2307/3133
- 536 20. Eggleston DB, Lipcius RN, Hines AH. Density-dependent predation by blue crabs upon  
537 infaunal clam species with contrasting distribution and abundance patterns. *Mar Ecol Prog*

- 538 Ser. 1992;85: 55–68. doi:10.3354/meps085055
- 539 21. Lipcius RN, Hines AH. Variable functional responses of a marine predator in dissimilar  
540 homogenous microhabitats. *Ecology*. 1986;67: 1361–1371.
- 541 22. Lipcius RN, Eggleston DB, Miller DL, Luhrs TC. The habitat-survival function for  
542 Caribbean spiny lobster: An inverted size effect and non-linearity in mixed algal and  
543 seagrass habitats. *Mar Freshw Res*. 1998;49: 807–816.
- 544 23. Fisher RA, Call GC, Grubs RD. Cownose ray (*Rhinoptera bonasus*) predation relative to  
545 bivalve ontogeny. *J Shellfish Res*. 2011;30: 187–196. doi:10.2983/035.030.0126
- 546 24. Glaspie CN. *Mya arenaria* population and disease survey. In: Knowledge Network for  
547 Biocomplexity. 2017. doi:doi:10.5063/F1WM1BJD
- 548 25. Glaspie CN. Chesapeake Bay bivalve survey 2011-2013. In: Knowledge Network for  
549 Biocomplexity. 2017. doi:doi:10.5063/F1N29V34
- 550 26. Hines A, Haddon A, Wiechert L. Guild structure and foraging impact of blue crabs and  
551 epibenthic fish in a sub-estuary of Chesapeake Bay. *Mar Ecol Prog Ser*. 1990;67: 105–  
552 126. doi:10.3354/meps067105
- 553 27. Lipcius RN, Eggleston DB, Heck KL, Seitz RD, van Monfrans J. Post-settlement  
554 abundance, survival, and growth of postlarvae and young juvenile blue crabs in nursery  
555 habitats. In: Kennedy VS, Cronin LE, editors. *Biology and Management of the Blue Crab*.  
556 Baltimore, MD: University of Maryland Press; 2007. pp. 535–565.
- 557 28. Fisher RA. Life history, trophic ecology, and prey handling by cownose ray, *Rhinoptera*  
558 *bonasus*, from Chesapeake Bay. Gloucester Point, VA; 2010.
- 559 29. Seitz RD, Lipcius RN, Hines AH, Eggleston DB. Density-dependent predation, habitat  
560 variations, and the persistence of marine bivalve prey. *Ecology*. 2001;82: 2435–2451.

- 561 doi:10.1890/0012-9658(2001)082[2435:DDPHVA]2.0.CO;2
- 562 30. Skilleter GA. Refuges from predation and the persistence of estuarine clam populations.  
563 Mar Ecol Prog Ser. 1994;109: 29–42. doi:10.3354/meps109029
- 564 31. Underwood AJ. Experiments in Ecology: Their Logical Design and Interpretation Using  
565 Analysis of Variance. Cambridge: Cambridge University Press; 1997.
- 566 32. Glaspie CN, Longmire K, Seitz RD. Acidification alters predator-prey interactions of blue  
567 crab *Callinectes sapidus* and soft-shell clam *Mya arenaria*. J Exp Mar Bio Ecol. Elsevier  
568 B.V.; 2017;489: 58–65. doi:10.1016/j.jembe.2016.11.010
- 569 33. Arnold WS. The effects of prey size, predator size, and sediment composition on the rate  
570 of predation of the blue crab, *Callinectes sapidus* Rathbun, on the hard clam, *Mercenaria*  
571 *mercenaria* (Linné). J Exp Mar Bio Ecol. 1984;80: 207–219.
- 572 34. Taylor DL, Eggleston DB. Effects of hypoxia on an estuarine predator-prey interaction:  
573 Foraging behavior and mutual interference in the blue crab *Callinectes sapidus* and the  
574 infaunal clam prey *Mya arenaria*. Mar Ecol Prog Ser. 2000;196: 221–237.  
575 doi:10.3354/meps196221
- 576 35. Cronin TW, Forward RB. The visual pigments of crabs 1. Spectral characteristics. J Comp  
577 Physiol A. 1988;162: 463–478.
- 578 36. R Core Team. R: A language and environment for statistical computing [Internet]. Vienna,  
579 Austria: R Foundation for Statistical Computing; 2017. Available: [http://www.r-](http://www.r-project.org/)  
580 [project.org/](http://www.r-project.org/)
- 581 37. Glaspie CN. *Mya arenaria* and *Mercenaria mercenaria* predator-prey dynamics. In:  
582 Knowledge Network for Biocomplexity. 2018. doi: 10.5063/F1C24TNH
- 583 38. Peterson CH, Fodrie FJ, Summerson HC, Powers SP. Site-specific and density-dependent

- 584 extinction of prey by schooling rays: generation of a population sink in top-quality habitat  
585 for bay scallops. *Oecologia*. 2001;129: 349–356. doi:10.1007/s004420100742
- 586 39. Laurance WF, Yensen E. Predicting the impact of edge effects in fragmented habitats.  
587 *Biol Conserv*. 1991;55: 77–92.
- 588 40. Murdoch WW, Oaten A. Predation and population stability. *Adv Ecol Res*. 1975;9: 1–131.
- 589 41. Wright LD, Prior DB, Hobbs CH, Byrne RJ, Boon JD, Schaffner LC, et al. Spatial  
590 variability of bottom types in the lower Chesapeake Bay and adjoining estuaries and inner  
591 shelf. *Estuar Coast Shelf Sci*. 1987;24: 765–784. doi:10.1016/0272-7714(87)90151-X
- 592 42. Beck MW, Brumbaugh RD, Airoidi L, Carranza A, Coen LD, Crawford C, et al. Oyster  
593 reefs at risk and recommendations for conservation, restoration, and management.  
594 *Bioscience*. 2011;61: 107–116. doi:10.1525/bio.2011.61.2.5
- 595 43. Rothschild BJ, Ault JS, Gouletquer P, Héral M. Decline of the Chesapeake Bay oyster  
596 population: A century of habitat destruction and overfishing. *Mar Ecol Prog Ser*.  
597 1994;111: 29–39. doi:10.3354/meps111029
- 598 44. Dungan CF, Hamilton RM, Hudson KL, McCollough CB, Reece KS. Two epizootic  
599 diseases in Chesapeake Bay commercial clams, *Mya arenaria* and *Tagelus plebeius*. *Dis*  
600 *Aquat Organ*. 2002;50: 67–78.
- 601 45. Homer ML, Dungan CF, Tarnowski ML. Assessment of Chesapeake Bay commercial  
602 softshell clams *Mya arenaria* and *Tagelus plebeius*. Report to NOAA Chesapeake Bay  
603 Fisheries Science Program, Award NA07NMF4570326; 2011.
- 604 46. Orth RJ, Moore KA. Chesapeake Bay: An unprecedented decline in submerged aquatic  
605 vegetation. *Science* (80- ). 1983;222: 51–53.
- 606 47. Glaspie CN, Seitz RD. Role of habitat and predators in maintaining functional diversity of

- 607 estuarine bivalves. *Mar Ecol Prog Ser.* 2017;570: 113–125. doi:10.3354/meps12103
- 608 48. Duarte CM, Dennison WC, Orth RJW, Carruthers TJB. The charisma of coastal  
609 ecosystems: Addressing the imbalance. *Estuaries and Coasts.* 2008;31: 233–238.  
610 doi:10.1007/s12237-008-9038-7
- 611 49. Hunsicker ME, Ciannelli L, Bailey KM, Buckel JA, Wilson White J, Link JS, et al.  
612 Functional responses and scaling in predator-prey interactions of marine fishes:  
613 Contemporary issues and emerging concepts. *Ecol Lett.* 2011;14: 1288–1299.  
614 doi:10.1111/j.1461-0248.2011.01696.x
- 615 50. Sinclair ARE, Byrom AE. Understanding ecosystem dynamics for conservation of biota. *J*  
616 *Anim Ecol.* 2006;75: 64–79. doi:10.1111/j.1365-2656.2006.01036.x
- 617 51. Hughes TP, Bellwood DR, Folke C, Steneck RS, Wilson J. New paradigms for supporting  
618 the resilience of marine ecosystems. *Trends Ecol Evol.* 2005;20: 380–386.  
619 doi:10.1016/j.tree.2005.03.022
- 620 52. Gascoigne JC, Lipcius RN. Allee effect driven by predation. *J Appl Ecol.* 2004;41: 801–  
621 810. doi:10.1111/j.0021-8901.2004.00944.x
- 622 53. Kramer AM, Drake JM. Experimental demonstration of population extinction due to a  
623 predator-driven Allee effect. *J Anim Ecol.* 2010;79: 633–639. doi:10.1111/j.1365-  
624 2656.2009.01657.x
- 625 54. Bellmore JR, Baxter C V., Connolly PJ. Spatial complexity reduces interaction strengths  
626 in the meta-food web of a river floodplain mosaic. *Ecology.* 2015;96: 274–283.  
627 doi:10.1890/14-0733.1
- 628 55. Uszko W, Diehl S, Pitsch N, Lengfellner K, Müller T. When is a type III functional  
629 response stabilizing? Theory and practice of predicting plankton dynamics under

- 630 enrichment. *Ecology*. 2015;96: 3243–3256. doi:10.1890/15-0055.1
- 631 56. Sinclair ARE, Pech RP, Dickman CR, Hik D, Mahon P, Newsome AE. Predicting effects  
632 of predation on conservation of endangered prey. *Conserv Biol*. 1998;12: 564–575.
- 633 57. Madadi H, Mohajeri Parizi E, Allahyari H, Enkegaard A. Assessment of the biological  
634 control capability of *Hippodamia variegata* (Col.: Coccinellidae) using functional  
635 response experiments. *J Pest Sci (2004)*. 2011;84: 447–455. doi:10.1007/s10340-011-  
636 0387-9
- 637 58. Boukal DS, Sabelis MW, Berec L. How predator functional responses and Allee effects in  
638 prey affect the paradox of enrichment and population collapses. *Theor Popul Biol*.  
639 2007;72: 136–147. doi:10.1016/j.tpb.2006.12.003
- 640 59. Whetstone JM, Eversole AG. Effects of size and temperature on mud crab, *Panopeus*  
641 *herbstii*, predation on hard clams, *Mercenaria mercenaria*. *Estuaries*. 1981;4: 153–156.
- 642 60. Beal BF, Kraus MG. Interactive effects of initial size, stocking density, and type of  
643 predator deterrent netting on survival and growth of cultured juveniles of the soft-shell  
644 clam, *Mya arenaria* L., in eastern Maine. *Aquaculture*. 2002;208: 81–111.  
645 doi:10.1016/S0044-8486(01)00900-0  
646  
647  
648  
649  
650  
651  
652

653 **SUPPORTING INFORMATION**

654

655 **S1 Table. Summary of Tukey HSD results for the caging study interaction term between**  
656 **habitat and cage type.** For each pairwise comparison, 95% confidence intervals (CI) and  
657 adjusted p values are presented. Data were Box-Cox transformed ( $\lambda = 0.51$ ) prior to analysis and  
658 are not back-transformed. Only interactions with significant p values at  $\alpha = 0.20$  are shown.

659

660 **S2 Table. Summary of Tukey HSD results for the mesocosm study proportional mortality**  
661 **interaction term between species and density.** For each pairwise comparison, 95% confidence  
662 intervals (CI) and adjusted p values are presented. Data were Box-Cox transformed ( $\lambda = -0.14$ )  
663 prior to analysis and are not back-transformed. Only interactions with significant p values at  $\alpha =$   
664 0.20 are shown.

665

666 **S3 Table. Summary of Tukey HSD results for the mesocosm study bivalve proportional**  
667 **mortality interaction term between species and habitat.** For each pairwise comparison, 95%  
668 confidence intervals (CI) and adjusted p values are presented. Data were Box-Cox transformed  
669 ( $\lambda = -0.14$ ) prior to analysis and are not back-transformed. Only interactions with significant p  
670 values at  $\alpha = 0.20$  are shown.

671

672 **S4 Table. Summary of Tukey HSD results for the mesocosm study *Callinectes sapidus***  
673 **handling time interaction term between species and habitat.** For each pairwise comparison,  
674 95% confidence intervals (CI) and adjusted p values are presented. Data were fourth-root

675 transformed prior to analysis and are not back-transformed. Only interactions with significant p  
676 values at  $\alpha = 0.20$  are shown.

677

678 **S5 Table. Summary of Tukey HSD results for the mesocosm study *Callinectes sapidus***

679 **search time interaction term between species and density.** For each pairwise comparison,

680 95% confidence intervals (CI) and adjusted p values are presented. Data were fourth-root

681 transformed prior to analysis and are not back-transformed. Only interactions with significant p

682 values at  $\alpha = 0.20$  are shown.

683

684 **S6 Table. Summary of Tukey HSD results for the mesocosm study *Callinectes sapidus***

685 **search time interaction term between species, density, and habitat.** For each pairwise

686 comparison, 95% confidence intervals (CI) and adjusted p values are presented. Data were

687 fourth-root transformed prior to analysis and are not back-transformed. Only interactions with

688 significant p values at  $\alpha = 0.20$  are shown.

689



**a.**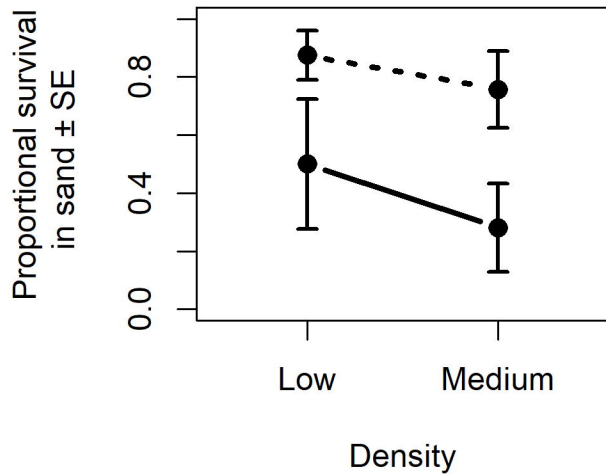**b.**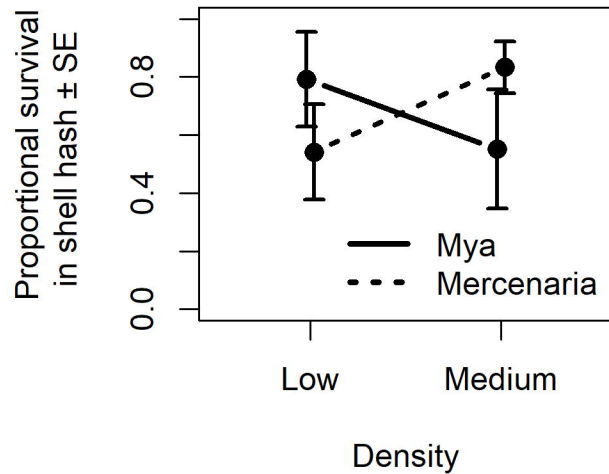**c.**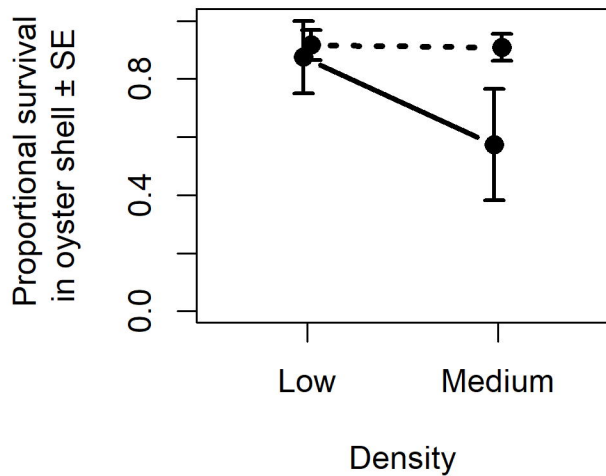**d.**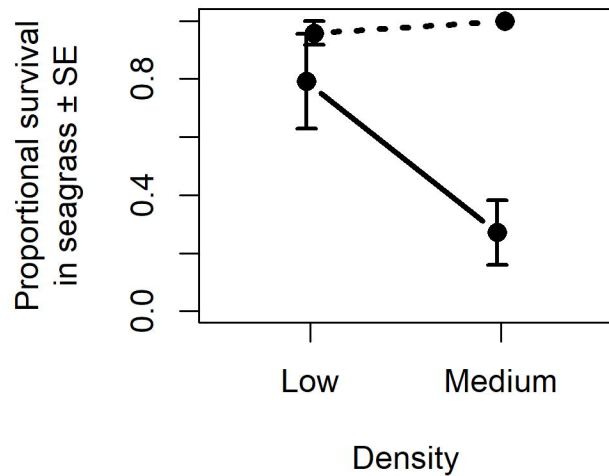

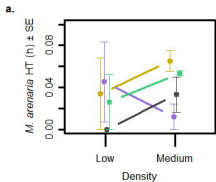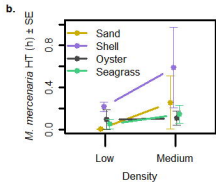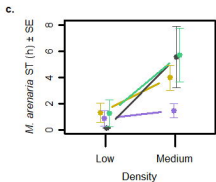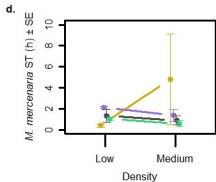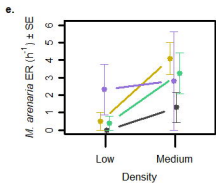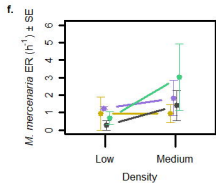

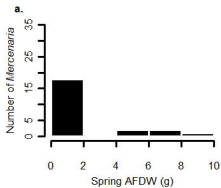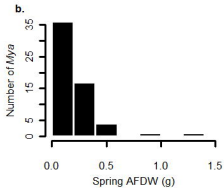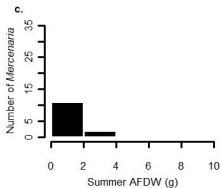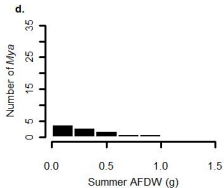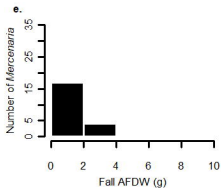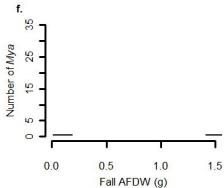

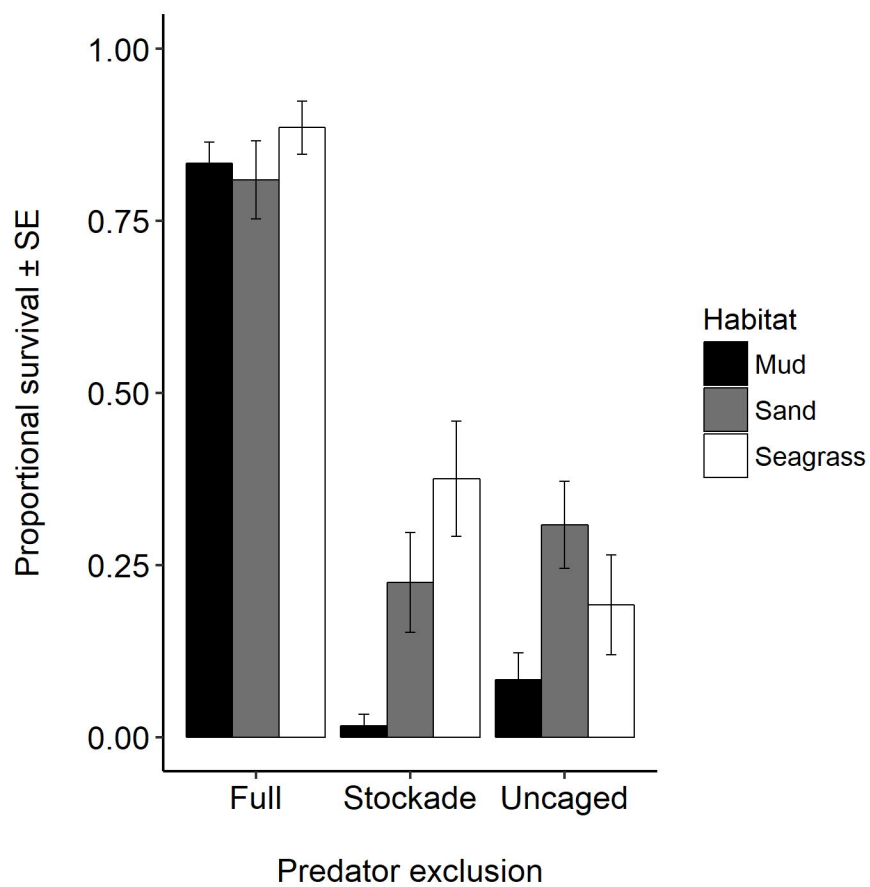

Source: https://www.biorxiv.org/content/10.1101/224089v2.full.pdf
